# Supplementary material
Source: Springer Nature journal article supplement (https://www.springermedizin.de/resource/supplementary/12891_2008_713_MOESM1_ESM.pdf/9506240)
Supplement: MOESM1 [file 9506240]

## Invited to Baseline Examination n=600

**Included n=303**

Forearm fracture n=171  
Humerus fracture n=37  
Vertebral fracture n=55  
Hip fracture n=40

**Not-included n=297**

Internal exclusion n=97  
-Due to present criteria

External dropout n=200  
-Passive refusers n=155  
-Active refusers n=45

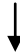

## Invited to Two-year Follow-up, Subgroups n=95

**Responded n=91**

Vertebral fracture n=53  
Hip fracture n=38

**Dropout n=4**

-Refusers n=2  
-Died n=1  
-Stroke n=1

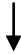

## Invited to Seven-year Follow-up, Subgroups n=91

**Responded n=67**

Vertebral fracture n= 42  
Hip fracture n=25

**Dropout n=24**

-Refusers n=8  
-Died n=13  
-Stroke or dementia=3
